# Supplementary material
Source: PubMed Central journal article supplement (PMC6440220)
Supplement: jamaotolaryngolheadnecksurg-145-109-s001.pdf [file jamaotolaryngolheadnecksurg-145-109-s001.pdf]

## Supplementary Online Content

Jiam NT, Gilbert M, Cooke D, et al. The association between flat-panel computed tomographic imaging–guided place-pitch mapping and speech and pitch perception in cochlear implant users. *JAMA Otolaryngol Head Neck Surg*. Published online November 21, 2018. doi:10.1001/jamaoto.2018.3096

### **eTable.** Demographic Information on Participants With Cochlear Implants

This supplementary material has been provided by the authors to give readers additional information about their work.

| Subject | Sex | Age, y <sup>1</sup> | Age, y <sup>2</sup> | Etiology           | Implant Processor | Implant Side | Implant Use, y | Residual Hearing |
|---------|-----|---------------------|---------------------|--------------------|-------------------|--------------|----------------|------------------|
| 1       | F   | 50                  | 62                  | Idiopathic         | Rondo; Sonnet     | Uni (Right)  | 4              | No               |
| 2       | F   | 57                  | 76                  | Presbycusis        | Rondo             | Uni (Right)  | 2              | No               |
| 3       | F   | 40                  | 58                  | Idiopathic         | Opus 2; Sonnet    | Uni (Left)   | 2.5            | No               |
| 4       | M   | 22                  | 68                  | Artillery Noise    | Sonnet            | Uni (Right)  | 4              | Yes, c/l ear     |
| 5       | M   | 46                  | 46                  | Idiopathic         | Rondo             | Bilateral    | 7.5; 4         | No               |
| 6       | M   | 0                   | 0                   | Congenital         | Rondo; Sonnet     | Bilateral    | 1.6; 1.4       | No               |
| 7       | F   | 45                  | 45                  | Idiopathic         | Opus 2            | Bilateral    | 4; 4.2         | No               |
| 8       | M   | 20                  | 32                  | Idiopathic         | Opus 2            | Uni (Right)  | 5.5            | No               |
| 9       | F   | 26                  | 29                  | Otosclerosis       | Opus 2            | Uni (Left)   | 6.5            | No               |
| 10      | F   | 44                  | 51                  | Genetic            | Opus 2; Sonnet    | Bilateral    | 3; 6.3         | Yes, right ear   |
| 11      | M   | 63                  | 67                  | Impact Noise       | Opus 2; Sonnet    | Uni (Left)   | 7              | Yes, c/l ear     |
| 12      | F   | 0                   | 0                   | Rubella            | Opus 2; Sonnet    | Bilateral    | 16; 1.5        | No               |
| 13      | M   | 34                  | 34                  | Artillery Noise    | Opus 2; Rondo     | Uni (Left)   | 3.75           | Yes, c/l ear     |
| 14      | M   | 54                  | 54                  | Multiple Sclerosis | Rondo; Sonnet     | Uni (Right)  | 1.75           | Yes, high freq   |
| 15      | F   | 36                  | 43                  | Genetic            | Opus 2; Rondo     | Bilateral    | 2.5; 3         | No               |
| 16      | F   | 47                  | 50                  | Genetic            | Opus 2; Sonnet    | Bilateral    | 2; 5           | No               |
| 17      | F   | 50                  | 52                  | Meniere            | Sonnet            | Uni (Right)  | 1.5            | Yes, c/l         |

**eTable 1. Demographic information for participants with cochlear implants.** This table summarizes the demographic information for all 17 patients including sex, age, etiology of hearing loss, type of cochlear implant processor, and laterality. Abbreviations: y, Years; <sup>1</sup>, Age at onset of hearing loss; <sup>2</sup>, Age at onset of profound deafness; freq, Frequency; c/l, Contralateral.
